# Supplementary material for: EvoAI enables extreme compression and reconstruction of the protein sequence space
Source: Research Square preprint supplement (doi:10.21203/rs.3.rs-3930833/v1), 2024-02-23
Supplement: Supplementary file 1 [file 4e3ad0062639a1cdba5b3a9f.docx]

Supplementary Table 1. Fold repression of AmeR variants from EvoScan.

| AmeR variants | Fold repression |
| --- | --- |
| WT | 3.467 |
| D33E R43G A53T S57R A75V P94L D119N | 95.773 |
| A36T S57R V206I | 63.723 |
| R43G A53T S57R A75V P94L D119N | 59.304 |
| S57R A75T C93R P94L D119N | 57.669 |
| D33E R43S S57R P94L | 57.000 |
| S57R E89V C93R D119N V206I | 56.313 |
| D33E S57R P94L V188F | 55.470 |
| S57R G83V P94L V188F A199S G212S | 51.800 |
| S57R P94L V206I | 51.096 |
| D33E R43S S57R C93R | 48.721 |
| D33E R43S S57R C93R H117R | 48.001 |
| D33E S57R A75T C93R | 46.913 |
| D33E R43S S57R C93R D119H | 46.162 |
| D33E S57R T182S Q204R | 45.162 |
| R32H D33E S57R V188I | 44.682 |
| S57R C93R P94L | 44.463 |
| D33E R43S S57R A75T C93R | 43.978 |
| S57R P94L D119N | 43.827 |
| R43S S57R G83V P94L V188F A199S G212S | 43.481 |
| D33E R43S S57R P94L D119N | 43.368 |
| D33E S57R V188I | 42.384 |
| S57R E89V C93R D119N | 39.802 |
| R43G A53T S57R A75T P94L D119N | 39.367 |
| S57R I80V P94L | 38.669 |
| S57R G86R P94L D119N | 38.460 |
| S57R P94L H107Y V188L | 37.503 |
| A36S S57R P94L | 37.092 |
| D33E S57R | 36.324 |
| S57R P94L V188I | 35.839 |
| S57R I80V P94L M113L | 34.708 |
| S57R P94L V188F | 34.544 |
| A36T E44V S57R P94L V188F | 34.445 |
| D33E R43S S57R | 34.420 |
| S57R P94L V188L | 32.688 |
| D33E S57R R157H V188L | 32.646 |
| R43S S57R C93R D119N | 30.811 |
| G83V Q204H A218T | 30.667 |
| R43S S57R | 29.846 |
| D33E R43S | 27.719 |
| S57R N60K | 27.613 |
| S57R C93R P94L D119N | 27.099 |
| S57R | 26.755 |
| D33E R43S S57R D119N | 24.583 |
| R43G S57R A75T C93R P94L | 22.063 |
| S57R P94L | 20.552 |
| S57R G83V V188F A199S G212S | 19.931 |
| S57R C93R | 19.472 |
| D33E | 18.945 |
| I80V | 18.714 |
| I80V V188I | 18.489 |
| A36S R43S G46S S57R V206I | 18.321 |
| A36T I80V V188I A199S | 17.944 |
| A36T S57R | 17.607 |
| D33E G46S A51T | 17.534 |
| I80V P94L | 16.602 |
| S57R V206I | 15.555 |
| D12V D33E | 14.875 |
| D16H D33E | 14.304 |
| D33E G46S | 13.500 |
| S57R C93Y P94L | 13.166 |
| I80V V188F | 12.961 |
| R125W Q204H | 11.784 |
| G83V V188F A199S G212S | 11.143 |
| R43S | 11.015 |
| G83V V188F Q204R | 10.621 |
| G83V V188F | 9.553 |
| G83V Q204H | 9.230 |
| I34V S57R P94L D119N | 8.996 |
| S57R V188I A199T | 8.653 |
| D16E | 8.310 |
| F88L P94L | 6.930 |
| R13C D33E | 6.373 |
| I124T | 4.595 |
| D54H | 4.288 |
| D119N I124K | 4.237 |
| D16N | 3.859 |
| M113L | 3.815 |
| R13S | 3.664 |
| V188F | 3.576 |
| P94L | 3.316 |
| A58S | 3.303 |
| K135R | 1.981 |

Supplementary Table 2. Epistasis between two different genotypes calculated in this study.

| ab | mutation A | mutation B | fAB | fab | faB | fAb | ε |
| --- | --- | --- | --- | --- | --- | --- | --- |
| WT | S57R | P94L | 20.406 | 3.455 | 26.245 | 3.316 | -5.700 |
| WT | D33E | S57R | 35.690 | 3.455 | 18.700 | 26.245 | -5.800 |
| WT | D33E | R43S | 27.556 | 3.455 | 18.700 | 10.662 | 1.649 |
| WT | I80V | P94L | 16.618 | 3.455 | 18.553 | 3.316 | -1.795 |
| WT | I80V | V188F | 12.876 | 3.455 | 18.553 | 3.578 | -5.800 |
| WT | S57R P94L | D119N | 43.429 | 3.455 | 20.406 | 3.860 | 22.617 |
| WT | D33E S57R | R43S | 34.125 | 3.455 | 35.690 | 10.662 | -8.772 |
| WT | D33E R43S | S57R | 34.125 | 3.455 | 27.556 | 26.245 | -16.221 |
| WT | I80V P94L | S57R | 38.053 | 3.455 | 16.618 | 26.245 | -1.356 |
| WT | S57R P94L | I80V | 38.053 | 3.455 | 20.406 | 18.553 | 2.549 |
| WT | S57R C93R | P94L | 43.412 | 3.455 | 19.397 | 3.316 | 24.153 |
| WT | S57R P94L | V188F | 34.182 | 3.455 | 20.406 | 3.578 | 13.652 |
| WT | S57R V206I | P94L | 50.355 | 3.455 | 15.414 | 3.316 | 35.080 |
| WT | S57R C93R P94L | D119N | 27.078 | 3.455 | 43.412 | 3.860 | -16.739 |
| WT | D33E R43S S57R | D119N | 24.136 | 3.455 | 34.125 | 3.860 | -10.395 |
| WT | D33E R43S | S57R C93R | 48.471 | 3.455 | 19.397 | 27.556 | 4.973 |
| WT | S57R I80V P94L | M113L | 34.233 | 3.455 | 38.053 | 3.807 | -4.172 |
| WT | S57R P94L V188F | D33E | 54.857 | 3.455 | 34.182 | 18.700 | 5.430 |
| WT | D33E S57R A75T C93R | R43S | 44.088 | 3.455 | 45.242 | 10.662 | -8.361 |
| WT | G83V V188F A199S G212S | S57R | 20.000 | 3.455 | 11.124 | 26.245 | -13.914 |
| WT | S57R G83V V188F A199S G212S | P94L | 51.133 | 3.455 | 20.000 | 3.316 | 31.272 |
| WT | G83V V188F A199S G212S | S57R P94L | 51.133 | 3.455 | 11.124 | 20.406 | 23.058 |
| WT | S57R G83V P94L V188F A199S G212S | R43S | 43.778 | 3.455 | 51.133 | 10.662 | -14.563 |
| WT | R43G A53T S57R A75V P94L D119N | D33E | 89.882 | 3.455 | 59.000 | 18.700 | 15.637 |
| D33E | S57R | R43S | 34.125 | 18.700 | 35.690 | 27.556 | -10.421 |
| S57R | P94L V188F | D33E | 54.857 | 26.245 | 34.182 | 35.690 | 11.230 |
| S57R | G83V V188F A199S G212S | P94L | 51.133 | 26.245 | 20.000 | 20.406 | 36.972 |
| P94L | S57R | I80V | 38.053 | 3.316 | 20.406 | 16.618 | 4.344 |

Supplementary Table 3. Fold repression of designed AmeR variants by different methods.

| AmeR variants | Design method | Fold repression |
| --- | --- | --- |
| C93R S57R I80V D33E I124T T182S | EvoScan | 28.899 |
| N60K D33E S57R T182S I80V C93R | EvoScan | 38.361 |
| I124T I80V D33E N60K C93R S57R | EvoScan | 30.859 |
| C93R I80V H107Y S57R T182S D33E | EvoScan | 26.707 |
| H107Y D33E C93R I80V S57R I124T | EvoScan | 28.054 |
| I124K S57R C93R D33E I80V T182S | EvoScan | 22.191 |
| D33E C93R S57R H107Y I80V N60K | EvoScan | 27.856 |
| T182S D33E I80V C93R R125W S57R | EvoScan | 11.448 |
| S57R N60K I80V D33E I124T T182S | EvoScan | 10.770 |
| I80V S57R N60K C93R D33E I124K | EvoScan | 28.003 |
| S98K A100K D142K A51K N197K T200K | DMS | 2.047 |
| D142R A51K T200K S98K A100K N197K | DMS | 1.753 |
| T200K S98K D142K A100K N197K R125E | DMS | 1.358 |
| A100K R125E S98K T200K D142R N197K | DMS | 1.240 |
| N197K A51K S98K R125E A100K D142K | DMS | 1.234 |
| D78L S98K T200K D142K N197K A100K | DMS | 1.171 |
| A51K A100K R125E D142K T200K S98K | DMS | 1.240 |
| T200K D142R S98K A100K D78L N197K | DMS | 1.461 |
| D142L T200K N197K A51K A100K S98K | DMS | 1.717 |
| R125E A51K A100K D78L S98K D142K | DMS | 1.810 |

Supplementary Table 4. Sequences of gRNAs.

| gRNA | Target | DNA sequence |
| --- | --- | --- |
| CDR1 | EGFP nanobody | TGAACCGTTACTCAATGCGC |
| CDR2 | EGFP nanobody | GTGGCCGGAATGAGTTCTGC |
| Off-target | EGFP nanobody | CAAATGTCGGCTTCGAGTAT |
| CDR3 | EGFP nanobody | CAAATGTCGGCTTCAAGTAT |
| 1 | Mpro | GATGAGTGGTTTTAGAAAAA |
| 2 | Mpro | ATTCCCATCTGGTAAAGTTG |
| 3 | Mpro | TGTATGGTACAAGTAACTTG |
| 4 | Mpro | CAACTACACTTAACGGTCTT |
| 5 | Mpro | GAGGTGCAGATCACATGTCT |
| 6 | Mpro | CTGAAGACATGCTTAACCCT |
| 7 | Mpro | TAATTATGAAGATTTACTCA |
| 8 | Mpro | TAAGTCTAATCATAATTTCT |
| 9 | Mpro | AATGTTCAACTCAGGGTTAT |
| 10 | Mpro | AAATTGTGTACTTAAGCTTA |
| 11 | Mpro | ATCCTAAGACACCTAAGTAT |
| 12 | Mpro | AAGTTTGTTCGCATTCAACC |
| 13 | Mpro | TCAGTGTTAGCTTGTTACAA |
| 14 | Mpro | TGTTACAATGGTTCACCATC |
| 15 | Mpro | GTGTTTACCAATGTGCTATG |
| 16 | Mpro | AGGCCCAATTTCACTATTAA |
| 17 | Mpro | TCATTCCTTAATGGTTCATG |
| 18 | Mpro | ACACTACCACATGAACCATT |
| 19 | Mpro | TTTTTGTTACATGCACCATA |
| 20 | Mpro | TTACCAACTGGAGTTCATGC |
| 21 | Mpro | GACTTAGAAGGTAACTTTTA |
| 22 | Mpro | TTTATGGACCTTTTGTTGAC |
| 23 | Mpro | AGGCAAACAGCACAAGCAGC |
| 24 | Mpro | TTACAGTTAATGTTTTAGCT |
| 25 | Mpro | TTGTACGCTGCTGTTATAAA |
| 26 | Mpro | TCTTAATGACTTTAACCTTG |
| 27 | Mpro | CTAACACAAGACCATGTTGA |
| 28 | Mpro | GGACCTCTTTCTGCTCAAAC |
| 29 | Mpro | TTTTAGATATGTGTGCTTCA |
| 30 | Mpro | TTAAAAGAATTACTGCAAAA |
| 31 | Mpro | TATGAATGGACGTACCATAT |
| 32 | Mpro | GATGTTGTTAGACAATGCTC |
| 1 | AmeR | TGATCGTAAAAGCGATCTGC |
| 2 | AmeR | AGAAACCCGTCGTGATATTC |
| 3 | AmeR | GAAGAACTGTTTCGTGAACG |
| 4 | AmeR | AAGCGCACTGAATATGAGTC |
| 5 | AmeR | TTTTAGCAGCAAAAACGCAC |
| 6 | AmeR | TGAACGTCAGATTTGTCCGC |
| 7 | AmeR | TCTGATGGAACAGCATCATC |
| 8 | AmeR | GCCAAACAGGATATGAAATG |
| 9 | AmeR | CTGGCCGAAATTATTCGTGA |
| 10 | AmeR | GTATATTGCAACCGATATTC |
| 11 | AmeR | ACTGACCAGCGTTATTCATC |
| 12 | AmeR | GGCAACCCGTTGTGATCAGC |
| 13 | AmeR | TGCAGGTCTGCGTAATCCGC |

Supplementary Table 5. Sequences of genetic parts.

| Name | Type | DNA sequence |
| --- | --- | --- |
| J23101 | promoter | TTTACAGCTAGCTCAGTCCTAGGTATTATGCTAGC |
| pVanA | promoter | ATTGGATCCAATTGACAGCTAGCTCAGTCCTAGGTACCATTGGATCCAAT |
| pGate_1 | promoter | TTTACACCAACTCCTAGTAGGGGTATTATGCTAGC |
| pTac | promoter | TGTTGACAATTAATCATCGGCTCGTATAATGTGTGGAATTGTGAGCGCTCACAATT |
| p434 | promoter | TTGACAAACAAGATATCTTAAATGAAAATACAAGAAATCTTAAAT |
| pAmeR | promoter | GATAGTGACAAACTTGACAACTCATCACTTCCTAGGTATAATGCTAGCTACTAGAG |
| pPhlF | promoter | CGACGTACGGTGGAATCTGATTCGTTACCAATTGACATGATACGAAACGTACCGTATCGTTAAGGT |
| B0034 | RBS | AAAGAGGAGAAA |
| B0064 | RBS | AAAGAGGGGAAA |
| S1 | RBS | GAGTCTATGGACTATGTTTTCACAGAGGAGGTACCAGG |
| P2 | RBS | GGAGCTATGGACTATGTTTGAAAGGCTGAAATACTAG |
| P3 | RBS | CTTTACGAGGGCGATCCT |
| sd2 | RBS | AAGGAAA |
| sd5 | RBS | AAGGAAAAAA |
| sd8 | RBS | AAGGAAAAAAAAA |
| LacI | gene | ATGAAACCAGTAACGTTATACGATGTCGCAGAGTATGCCGGTGTCTCTTATCAGACCGTTTCCCGCGTGGTGAACCAGGCCAGCCACGTTTCTGCGAAAACGCGGGAAAAAGTGGAAGCGGCGATGGCGGAGCTGAATTACATTCCCAACCGCGTGGCACAACAACTGGCGGGCAAACAGTCGTTGCTGATTGGCGTTGCCACCTCCAGTCTGGCCCTGCACGCGCCGTCGCAAATTGTCGCGGCGATTAAATCTCGCGCCGATCAACTGGGTGCCAGCGTGGTGGTGTCGATGGTAGAACGAAGCGGCGTCGAAGCCTGTAAAGCGGCGGTGCACAATCTTCTCGCGCAACGCGTCAGTGGGCTGATCATTAACTATCCGCTGGATGACCAGGATGCCATTGCTGTGGAAGCTGCCTGCACTAATGTTCCGGCGTTATTTCTTGATGTCTCTGACCAGACACCCATCAACAGTATTATTTTCTCCCATGAGGACGGTACGCGACTGGGCGTGGAGCATCTGGTCGCATTGGGTCACCAGCAAATCGCGCTGTTAGCGGGCCCATTAAGTTCTGTCTCGGCGCGTCTGCGTCTGGCTGGCTGGCATAAATATCTCACTCGCAATCAAATTCAGCCGATAGCGGAACGGGAAGGCGACTGGAGTGCCATGTCCGGTTTTCAACAAACCATGCAAATGCTGAATGAGGGCATCGTTCCCACTGCGATGCTGGTTGCCAACGATCAGATGGCGCTGGGCGCAATGCGCGCCATTACCGAGTCCGGGCTGCGCGTTGGTGCGGATATCTCGGTAGTGGGATACGACGATACCGAAGATAGCTCATGTTATATCCCGCCGTTAACCACCATCAAACAGGATTTTCGCCTGCTGGGGCAAACCAGCGTGGACCGCTTGCTGCAACTCTCTCAGGGCCAGGCGGTGAAGGGCAATCAGCTGTTGCCAGTCTCACTGGTGAAAAGAAAAACCACCCTGGCGCCCAATACGCAAACCGCCTCTCCCCGCGCGTTGGCCGATTCATTAATGCAGCTGGCACGACAGGTTTCCCGACTGGAAAGCGGGCAGTGA |
| VanR | gene | ATGGACATGCCTCGTATTAAACCGGGTCAGCGTGTTATGATGGCACTGCGTAAAATGATTGCAAGCGGTGAAATCAAAAGTGGTGAACGTATTGCAGAAATTCCGACCGCAGCAGCACTGGGTGTTAGCCGTATGCCGGTTCGTATCGCACTGCGTTCACTGGAACAAGAAGGTCTGGTTGTTCGTCTGGGTGCACGTGGTTATGCAGCCCGTGGTGTTAGCAGCGATCAGATTCGTGATGCAATTGAAGTTCGTGGTGTTCTGGAAGGTTTTGCAGCACGTCGTCTGGCAGAACGTGGTATGACCGCAGAAACCCATGCACGTTTTGTTGTACTGATTGCAGAAGGTGAAGCACTGTTTGCAGCCGGTCGCCTGAATGGTGAAGATCTGGATCGTTATGCCGCATATAATCAGGCATTTCATGATACCCTGGTTAGCGCAGCAGGTAATGGTGCAGTTGAAAGCGCACTGGCACGTAATGGTTTTGAACCGTTTGCAGCAGCCGGTGCACTGGCCCTGGATCTGATGGACCTGTCTGCCGAATATGAACATCTGCTGGCAGCACATCGTCAGCATCAGGCAGTTCTGGATGCAGTTAGCTGTGGTGATGCCGAAGGTGCAGAACGTATTATGCGTGATCATGCACTGGCAGCAATTCGTAATGCAAAAGTTTTTGAAGCAGCAGCAAGCGCAGGCGCACCGCTGGGTGCAGCATGGTCAATTCGTGCAGATTGA |
| PhlF | gene | ATGGCACGTACCCCGAGCCGTAGCAGCATTGGTAGCCTGCGTAGTCCGCATACCCATAAAGCAATTCTGACCAGCACCATTGAAATCCTGAAAGAATGTGGTTATAGCGGTCTGAGCATTGAAAGCGTTGCACGTCGTGCCGGTGCAAGCAAACCGACCATTTATCGTTGGTGGACCAATAAAGCAGCACTGATTGCCGAAGTGTATGAAAATGAAAGCGAACAGGTGCGTAAATTTCCGGATCTGGGTAGCTTTAAAGCCGATCTGGATTTTCTGCTGCGTAATCTGTGGAAAGTTTGGCGTGAAACCATTTGTGGTGAAGCATTTCGTTGTGTTATTGCAGAAGCACAGCTGGACCCTGCAACCCTGACCCAGCTGAAAGATCAGTTTATGGAACGTCGTCGTGAGATGCCGAAAAAACTGGTTGAAAATGCCATTAGCAATGGTGAACTGCCGAAAGATACCAATCGTGAACTGCTGCTGGATATGATTTTTGGTTTTTGTTGGTATCGCCTGCTGACCGAACAGCTGACCGTTGAACAGGATATTGAAGAATTTACCTTCCTGCTGATTAATGGTGTTTGTCCGGGTACACAGCGTTAG |
| enCas9-PolIM5 | gene | AGCTTGATATCAACAGGCTCTCAGACTACGACGTGGACCATATCGTCCCTCAGAGCTTCCTCGCAGACGACTCAATTGACAATAAGGTGCTGACTCGCTCAGACAAGAACCGGGGAAAGTCAGATAACGTGCCCTCAGAGGAAGTCGTGAAAAAGATGAAGAACTATTGGCGCCAGCTTCTGAACGCAAAGCTGATCACTCAGCGGAAGTTCGACAATCTCACTAAGGCTGAGAGGGGCGGACTGAGCGAACTGGACAAAGCAGGATTCATTAAACGGCAACTTGTGGAGACTCGGCAGATTACTAAACATGTCGCCCAAATCCTTGACTCACGCATGAATACCAAGTACGACGAAAACGACAAACTTATCCGCGAGGTGAAGGTGATTACCCTGAAGTCCAAGCTGGTCAGCGATTTCAGAAAGGACTTTCAATTCTACAAAGTGCGGGAGATCAATAACTATCATCATGCTCATGACGCATATCTGAATGCCGTGGTGGGAACCGCCCTGATCAAGAAGTACCCAGCACTGGAAAGCGAGTTCGTGTACGGAGACTACAAGGTCTACGACGTGCGCAAGATGATTGCCAAATCTGAGCAGGAGATCGGAAAGGCCACCGCAAAGTACTTCTTCTACAGCAACATCATGAATTTCTTCAAGACCGAAATCACCCTTGCAAACGGTGAGATCCGGAAGGCGCCGCTCATCGAGACTAATGGGGAGACTGGCGAAATCGTGTGGGACAAGGGCAGAGATTTCGCTACCGTGCGCAAAGTGCTTTCTATGCCTCAAGTGAACATCGTGAAGAAAACCGAGGTGCAAACCGGAGGCTTTTCTAAGGAATCAATCCTCCCCAAGCGCAACTCCGACAAGCTCATTGCAAGGAAGAAGGATTGGGACCCTAAGAAGTACGGCGGATTCGATTCACCAACTGTGGCTTATTCTGTCCTGGTCGTGGCTAAGGTGGAAAAAGGAAAGTCTAAGAAGCTCAAGAGCGTGAAGGAACTGCTGGGTATCACCATTATGGAGCGCAGCTCCTTCGAGAAGAACCCAATTGACTTTCTCGAAGCCAAAGGTTACAAGGAAGTCAAGAAGGACCTTATCATCAAGCTCCCAAAGTATAGCCTGTTCGAACTGGAGAATGGGCGGAAGCGGATGCTCGCCTCCGCTGGCGAACTTCAGAAGGGTAATGAGCTGGCTCTCCCCTCCAAGTACGTGAATTTCCTCTACCTTGCAAGCCATTACGAGAAGCTGAAGGGGAGCCCCGAGGACAACGAGCAAAAGCAACTGTTTGTGGAGCAGCATAAGCATTATCTGGACGAGATCATTGAGCAGATTTCCGAGTTTTCTAAACGCGTCATTCTCGCTGATGCCAACCTCGATAAAGTCCTTAGCGCATACAATAAGCACAGAGACAAACCAATTCGGGAGCAGGCTGAGAATATCATCCACCTGTTCACCCTCACCAATCTTGGTGCCCCTGCCGCATTCAAGTACTTCGACACCACCATCGACCGGAAACGCTATACCTCCACCAAAGAAGTGCTGGACGCCACCCTCATCCACCAGAGCATCACCGGACTTTACGAAACTCGGATTGACCTCTCACAGCTCGGAGGGGATGGTTCTAGTGAAACCCCGGGAACAAGTGAGTCGGCCACCCCTGAAGGTGGATCAGGGGGTAGCGGATCCGTTCAGATCCCGCAGAACCCGCTGATTCTGGTTGACGGATCTAGTTACCTGTACCGTGCTTACCATGCTTTCCCGCCTTTGACCAATTCTGCTGGTGAACCTACGGGAGCTATGTACGGAGTTCTGAATATGTTGCGTTCTTTAATTATGCAGTACAAGCCTACCCACGCTGCTGTTGTTTTCGATGCTAAAGGTAAGACGTTCCGCGACGAGTTATTCGAGCACTATAAGTCTCACCGTCCTCCGATGCCTGATGACTTACGCGCTCAGATTGAGCCGCTGCATGCTATGGTGAAGGCTATGGGTTTACCTCTTTTGGCTGTCAGCGGTGTTGAGGCTGATGATGTCATTGGCACCTTAGCTCGTGAGGCTGAGAAGGCTGGTCGCCCTGTTTTGATTTCTACCGGTGACAAGGACATGGCTCAATTGGTTACCCCGAACATCACCCTGATCAACACCATGACCAACACGATTCTGGGTCCTGAGGAAGTTGTTAACAAATATGGTGTTCCTCCGGAGTTGATTATTGACTTTCTTGCTCTTATGGGCGATTCTTCAGACAATATCCCGGGTGTTCCAGGTGTTGGAGAGAAGACTGCTCAAGCTCTGCTTCAGGGTCTGGGTGGTTTGGACACCCTTTACGCTGAACCGGAGAAGATCGCCGGTCTGTCTTTTCGCGGTGCTAAGACCATGGCTGCTAAACTGGAACAGAATAAGGAGGTCGCATACCTGTCTTATCAATTGGCTACCATCAAGACGGATGTGGAGTTAGAACTTACGTGCGAGCAGCTTGAGGTTCAACAGCCTGCTGCTGAGGAACTGCTGGGTCTTTTTAAGAAATACGAATTTAAGCGTTGGACCGCCGACGTTGAGGCTGGTAAGTGGCTGCAAGCTAAGGGTGCTAAGCCGGCTGCTAAACCGCAAGAAACGAGTGTCGCTGATGAGGCTCCGGAGGTTACCGCTACCGTTATCTCTTACGATAATTATGTTACGATTCTGGACGAGGAAACCTTAAAGGCTTGGATCGCTAAATTAGAGAAGGCTCCTGTTTTCGCTTTCGACACGGAAACGGATTCTCTGGACAATATTAGTGCGAATCTTGTTGGTCTGAGTTTCGCAATTGAACCGGGTGTTGCTGCTTACATCCCTGTGGCACACGACTACCTGGACGCTCCGGACCAGATTTCACGTGAACGCGCTCTGGAACTGCTGAAGCCTTTATTAGAGGACGAGAAAGCTTTGAAAGTTGGTCAGAATTTGAAGTATGCTCGTGGAATCTTAGCTAATTATGGTATCGAGTTGCGCGGTATCGCTTTCGACACGATGTTGGAATCTTATATCCTGAACTCTGTCGCTGGTCGCCATGACATGGACTCTCTGGCTGAGCGCTGGCTGAAACATAAGACGATTACCTTCGAGGAAATCGCAGGAAAGGGTAAGAACCAGCTCACGTTCAATCAAATCGCTCTGGAGGAAGCTGGTCGCTATGCTGCTGAGGACGCTGACGTTACTCTGCAACTGCACTTGAAGATGTGGCCTGACTTGCAGAAGCATAAGGGTCCACTGAATGTTTTTGAAAACATTGAGATGCCTTTGGTTCCAGTTCTGTCTCGTATCGAGCGCAATGGCGTTAAAATTGACCCAAAGGTTTTACATAACCACTCAGAGGAACTGACGCTGCGCTTAGCCGAATTGGAGAAAAAGGCTCACGAGATCGCTGGCGAAGAGTTCAATCTGTCATCTACGAAACAACTGCAGACTATCCTGTTCGAGAAGCAAGGTATCAAGCCATTAAAAAAGACCCCTGGCGGTGCTCCGTCTACCTCTGAGGAAGTTTTGGAGGAGTTAGCTTTGGATTACCCTCTGCCGAAGGTTATCTTGGAATACCGCGGTTTGGCTAAATTGAAGTCTACTTATACGGATAAACTTCCTTTGATGATTAATCCAAAGACGGGTCGCGTTCACACGTCGTACCATCAAGCTGTTACCGCTACCGGTCGCCTGTCTTCTACGGATCCGAATTTACAGAATATTCCTGTGCGCAATGAGGAGGGCCGCCGCATTCGTCAAGCTTTTATCGCTCCGGAAGACTACGTTATCGTTTCTGCTGATTATTCTCAAAATGAATTACGTATCATGGCTCACCTGTCTCGCGATAAGGGTCTGTTGACGGCCTTTGCTGAGGGTAAGGACATTCATCGTGCTACCGCTGCTGAGGTTTACGGCCTGCCGTTGGAAACGGTTACGTCTGAACAGCGTCGCTCTGCTAAGCGTATTAATTTCGGCTTAATCTACGGTATGTCTGCGTTTGGCTTAGCTCGTCAGCTGAATATCCCGCGCAAGGAAGCTCAAAAATATATGGATCTGTATTTTGAGCGTTACCACGGTGTTTTGGAATACATGGAGCGTACGCGCGCGCAAGCTAAGGAACAAGGTTATGTGGAAACCTTGGATGGTCGTCGCTTGTACTTGCCTGACATTAAGTCTTCTAACGGCGCCCGCCGCGCTGCTGCCGAGCGCGCTGCTATCAATGCTCCGATGCAAGGTACTGCTGCTGATATTATTAAGCGTGCTATGATCGCTGTGGACGCTTGGCTGCAAGCTGAACAGCCTCGCGTTCGCATGATTATGCAAGTTCATGACGAGTTGGTTTTCGAGGTGCATAAGGACGACGTGGACGCTGTTGCTAAACAAATCCACCAGTTGATGGAGAATTGCACGCGCTTAGACGTTCCGCTGCTGGTTGAAGTTGGTTCTGGTGAAAACTGGGACCAGGCTCACTAA |
| EGFP-cI434 | gene | ATGGTGAGCAAGGGCGAGGAGCTGTTCACCGGGGTGGTGCCCATCCTGGTCGAGCTGGACGGCGACGTAAACGGCCACAAGTTCAGCGTGTCCGGCGAGGGCGAGGGCGATGCCACCTACGGCAAGCTGACCCTGAAGTTCATCTGCACCACCGGCAAGCTGCCCGTGCCCTGGCCCACCCTCGTGACCACCTTCACCTACGGCGTGCAGTGCTTCAGCCGCTACCCCGACCACATGAAGCAGCACGACTTCTTCAAGTCCGCCATGCCCGAAGGCTACGTCCAGGAGCGCACCATCTTCTTCAAGGACGACGGCAACTACAAGACCCGCGCCGAGGTGAAGTTCGAGGGCGACACCCTGGTGAACCGCATCGAGCTGAAGGGCATCGACTTCAAGGAGGACGGCAACATCCTGGGGCACAAGCTGGAGTACAACTACAACAGCCACAACGTCTATATCATGGCCGACAAGCAGAAGAACGGCATCAAGGTGAACTTCAAGATCCGCCACAACATCGAGGACGGCAGCGTGCAGCTCGCCGACCACTACCAGCAGAACACCCCCATCGGCGACGGCCCCGTGCTGCTGCCCGACAACCACTACCTGAGCACCCAGTCCGCCCTGAGCAAAGACCCCAACGAGAAGCGCGATCACATGGTCCTGCTGGAGTTCGTGACCGCCGCCGGGATCACTCTCGGCATGGACGAGCTGTACAAGATGAGTATTTCTTCCAGGGTAAAAAGCAAAAGGATTCAGCTTGGACTTAACCAGGCTGAACTTGCTCAAAAGGTGGGGACTTCCAATGTTTCTATATCGCAGCTCGAAAGAGGTAAAACTAAGCGACCACGCTTTTTACCAGAACTTGCGTCAGCTCTTGGCGTAAGTGTTGACTGGCTGCTCAATGGCACCTCTGATTCGAATGTTAGATTTGTTGGGCACGTTGAGCCCAAAGGGAAATATCCATTGATTAGCATGGTTAGAGCTGGTTCGTGGTGTGAAGCTTAA |
| cIp22-EGFP nanobody | gene | ATGAGTATTTCTTCCAGGGTAAAAAGCAAAAGGATTCAGCTTGGACTTAACCAGGCTGAACTTGCTCAAAAGGTGGGGACTACCCAGCAGTCTATAGAGCAGCTCGAAAACGGTAAAACTAAGCGACCACGCTTTTTACCAGAACTTGCGTCAGCTCTTGGCGTAAGTGTTGACTGGCTGCTCAATGGCACCTCTGATTCGAATGTTAGATTTGTTGGGCACGTTGAGCCCAAAGGGAAATATCCATTGATTAGCATGGTTAGAGCTGGTTCGTGGTGTGAAGCTCAGGTACAGCTGCAGGAATCGGGTGGTGGCCTGGTTCAAGCAGGCGGCAGTTTACGCCTGTCATGTGCAGCGTCAGGTTTTCCAGTGAACCGTTACTCAATGCGCTGGTATCGTCAAGCACCAGGGAAAGAACGCGAGTTTGTGGCCGGAATGAGTTCTGCGGGTGACCGCTCTAGCTATGCGGATTCCGTGAAAGGACGCTTCACCATTTCTCGGGACAATGCCAAGAACACCGTGTATTTGCAGATGAACTCCCTGAAACCGGAAGATACGGCTGTCTACTATTGCGCTGCAAATGTCGGCTTCGAGTATTGGGGCCAGGGTACTCAGGTCACCGTAAGCAGCTAA |
| cIp22-substrate-cI434 | gene | ATGAGTATTTCTTCCAGGGTAAAAAGCAAAAGGATTCAGCTTGGACTTAACCAGGCTGAACTTGCTCAAAAGGTGGGGACTTCCAATGTTTCTATATCGCAGCTCGAAAGAGGTAAAACTAAGCGACCACGCTTTTTACCAGAACTTGCGTCAGCTCTTGGCGTAAGTGTTGACTGGCTGCTCAATGGCACCTCTGATTCGAATGTTAGATTTGTTGGGCACGTTGAGCCCAAAGGGAAATATCCATTGATTAGCATGGTTAGAGCTGGTTCGTGGTGTGAAGCTAGTGGAGGAGGAGCTTGTGCTGCTGTCTTGCAGAGTGGATTCCGAAAGAAGGGAGGAAGTGCTGGAAGTGGAGCTGGAGGAATGAGTATTTCTTCCAGGGTAAAAAGCAAAAGGATTCAGCTTGGACTTAACCAGGCTGAACTTGCTCAAAAGGTGGGGACTACCCAGCAGTCTATAGAGCAGCTCGAAAACGGTAAAACTAAGCGACCACGCTTTTTACCAGAACTTGCGTCAGCTCTTGGCGTAAGTGTTGACTGGCTGCTCAATGGCACCTCTGATTCGAATGTTAGATTTGTTGGGCACGTTGAGCCCAAAGGGAAATATCCATTGATTAGCATGGTTAGAGCTGGTTCGTGGTGTGAAGCTTAA |
| AmeR | gene | ATGAACAAAACCATTGATCAGGTGCGTAAAGGTGATCGTAAAAGCGATCTGCCGGTTCGTCGTCGTCCGCGTCGTAGTGCCGAAGAAACCCGTCGTGATATTCTGGCAAAAGCCGAAGAACTGTTTCGTGAACGTGGTTTTAATGCAGTTGCCATTGCAGATATTGCAAGCGCACTGAATATGAGTCCGGCAAATGTGTTTAAACATTTTAGCAGCAAAAACGCACTGGTTGATGCAATTGGTTTTGGTCAGATTGGTGTTTTTGAACGTCAGATTTGTCCGCTGGATAAAAGCCATGCACCGCTGGATCGTCTGCGTCATCTGGCACGTAATCTGATGGAACAGCATCATCAGGATCATTTCAAACACATACGGGTTTTTATTCAGATCCTGATGACCGCCAAACAGGATATGAAATGTGGCGATTATTACAAAAGCGTGATTGCAAAACTGCTGGCCGAAATTATTCGTGATGGTGTTGAAGCAGGTCTGTATATTGCAACCGATATTCCGGTTCTGGCAGAAACCGTTCTGCATGCACTGACCAGCGTTATTCATCCGGTTCTGATTGCACAAGAAGATATTGGTAATCTGGCAACCCGTTGTGATCAGCTGGTTGATCTGATTGATGCAGGTCTGCGTAATCCGCTGGCAAAATAA |
| Mpro | gene | ATGAGTGGTTTTAGAAAAATGGCATTCCCATCTGGTAAAGTTGAGGGTTGTATGGTACAAGTAACTTGTGGTACAACTACACTTAACGGTCTTTGGCTTGATGACGTAGTTTACTGTCCAAGACATGTGATCTGCACCTCTGAAGACATGCTTAACCCTAATTATGAAGATTTACTCATTCGTAAGTCTAATCATAATTTCTTGGTACAGGCTGGTAATGTTCAACTCAGGGTTATTGGACATTCTATGCAAAATTGTGTACTTAAGCTTAAGGTTGATACAGCCAATCCTAAGACACCTAAGTATAAGTTTGTTCGCATTCAACCAGGACAGACTTTTTCAGTGTTAGCTTGTTACAATGGTTCACCATCTGGTGTTTACCAATGTGCTATGAGGCCCAATTTCACTATTAAGGGTTCATTCCTTAATGGTTCATGTGGTAGTGTTGGTTTTAACATAGATTATGACTGTGTCTCTTTTTGTTACATGCACCATATGGAATTACCAACTGGAGTTCATGCTGGCACAGACTTAGAAGGTAACTTTTATGGACCTTTTGTTGACAGGCAAACAGCACAAGCAGCTGGTACGGACACAACTATTACAGTTAATGTTTTAGCTTGGTTGTACGCTGCTGTTATAAATGGAGACAGGTGGTTTCTCAATCGATTTACCACAACTCTTAATGACTTTAACCTTGTGGCTATGAAGTACAATTATGAACCTCTAACACAAGACCATGTTGACATACTAGGACCTCTTTCTGCTCAAACTGGAATTGCCGTTTTAGATATGTGTGCTTCATTAAAAGAATTACTGCAAAATGGTATGAATGGACGTACCATATTGGGTAGTGCTTTATTAGAAGATGAATTTACACCTTTTGATGTTGTTAGACAATGCTCAGGTGTTACTTTCCAATAA |
| recoded gIII | gene | ATGAAAAAATTATTATTCGCAATTCCTTTAGTTGTTCCTTTCTATTCTCACTCCGCTGAAACTGTTGAAAGTTGTTTAGCAAAACCCCATACAGAAAATTCATTTACTAACGTCTGGAAAGACGACAAAACTTTAGATCGTTACGCTAACTATGAGGGCTGTCTGTGGAATGCTACAGGCGTTGTAGTTTGTACTGGTGACGAAACTCAGTGTTACGGTACATGGGTTCCTATTGGGCTTGCTATCCCTGAAAATGAGGGTGGTGGCTCTGAGGGTGGTGGTTCTGAGGGTGGCGGTTCTGAGGGTGGCGGTACTAAACCTCCTGAGTACGGTGATACACCTATTCCGGGCTATACTTATATCAACCCTCTCGACGGCACTTATCCGCCTGGTACTGAGCAAAACCCCGCTAATCCTAATCCTTCTCTTGAGGAGTCTCAGCCTCTTAATACTTTCATGTTTCAGAATAATAGGTTCCGAAATAGGCAGGGGGCATTAACTGTTTATACGGGCACTGTTACTCAAGGCACTGACCCCGTTAAAACTTATTACCAGTACACTCCTGTATCATCAAAAGCCATGTATGACGCTTACTGGAACGGTAAATTCAGAGACTGCGCTTTCCATTCTGGCTTTAATGAGGATCCATTCGTTTGTGAATATCAAGGCCAATCGTCTGACCTGCCTCAACCTCCTGTCAATGCTGGCGGCGGCTCTGGTGGTGGTTCTGGTGGCGGCTCTGAGGGTGGTGGCTCTGAGGGTGGCGGTTCTGAGGGTGGCGGCTCTGAGGGAGGCGGTTCCGGTGGTGGCTCTGGTTCCGGTGATTTTGATTATGAAAAGATGGCAAACGCTAATAAGGGGGCTATGACCGAAAATGCCGATGAAAACGCGCTACAGTCTGACGCTAAAGGCAAACTTGATTCTGTCGCTACTGATTACGGTGCTGCTATCGATGGTTTCATTGGTGACGTTTCCGGCCTTGCTAATGGTAATGGTGCTACTGGTGATTTTGCTGGCTCTAATTCCCAAATGGCTCAAGTCGGTGACGGTGATAATTCACCTTTAATGAATAATTTCCGTCAATATTTACCTAGTCTTCCGCAGAGTGTAGAGTGCCGACCATTCGTTTTCGGTGCGGGCAAGCCGTACGAGTTCAGCATCGACTGCGATAAGATCAATTTGTTTCGAGGAGTTTTCGCATTCCTACTCTACGTGGCAACGTTCATGTACGTGTTCTCAACATTCGCCAATATTTTAAGAAACAAAGAGTCTTAA |
| eYFP | gene | ATGGTGAGCAAGGGCGAGGAGCTGTTCACCGGGGTGGTGCCCATCCTGGTCGAGCTGGACGGCGACGTAAACGGCCACAAGTTCAGCGTGTCCGGCGAGGGCGAGGGCGATGCCACCTACGGCAAGCTGACCCTGAAGTTCATCTGCACCACCGGCAAGCTGCCCGTGCCCTGGCCCACCCTCGTGACCACCTTCGGCTACGGCCTGCAATGCTTCGCCCGCTACCCCGACCACATGAAGCTGCACGACTTCTTCAAGTCCGCCATGCCCGAAGGCTACGTCCAGGAGCGCACCATCTTCTTCAAGGACGACGGCAACTACAAGACCCGCGCCGAGGTGAAGTTCGAGGGCGACACCCTGGTGAACCGCATCGAGCTGAAGGGCATCGACTTCAAGGAGGACGGCAACATCCTGGGGCACAAGCTGGAGTACAACTACAACAGCCACAACGTCTATATCATGGCCGACAAGCAGAAGAACGGCATCAAGGTGAACTTCAAGATCCGCCACAACATCGAGGACGGCAGCGTGCAGCTCGCCGACCACTACCAGCAGAACACCCCCATCGGCGACGGCCCCGTGCTGCTGCCCGACAACCACTACCTGAGCTACCAGTCCGCCCTGAGCAAAGACCCCAACGAGAAGCGCGATCACATGGTCCTGCTGGAGTTCGTGACCGCCGCCGGGATCACTCTCGGCATGGACGAGCTGTACAAGTAA |

Supplementary Table 6. Plasmids used in this study.

| Name | Usage | Resistance | Origin | Key parts |
| --- | --- | --- | --- | --- |
| pSZL1-01 | TP | SpecR | ColE1 | [VanR]-[pVanA-B0034-eSpCas9_linker_PolIM5] |
| pSZL1-02 | AP | KanR | p15A | [P_Gate1-gRNA_CDR1_chimera_tracrRNA]-[pTac-S1-cI434_EGFP]-[p434-P3-PhlF]-[pPhlF-B0064-gIII-recoded]-[LacI] |
| pSZL1-03 | AP | KanR | p15A | [P_Gate1-gRNA_CDR2_chimera_tracrRNA]-[pTac-S1-cI434_EGFP]-[p434-P3-PhlF]-[pPhlF-B0064-gIII-recoded]-[LacI] |
| pSZL1-04 | AP | KanR | p15A | [P_Gate1-gRNA_CDR3_chimera_tracrRNA]-[pTac-S1-cI434_EGFP]-[p434-P3-PhlF]-[pPhlF-B0064-gIII-recoded]-[LacI] |
| pSZL1-05 | AP | KanR | p15A | [P_Gate1-gRNA_off_chimera_tracrRNA]-[pTac-S1-cI434_EGFP]-[p434-P3-PhlF]-[pPhlF-B0064-gIII-recoded]-[LacI] |
| pSZL1-06 | SP |  | M13 | [M13_backbone-B0032-cIp22_EGFPnano] |
| pSZL1-07 | SP |  | M13 | [M13_backbone-B0032-cIp22_EGFPnano(E103K)] |
| pSZL1-08 | AP | KanR | p15A | [pTac-S1-cI434_EGFP]-[p434-P3-PhlF]-[pPhlF-B0064-gIII-recoded]-[LacI] |
| pSZL1-09 | SP |  | M13 | [M13_backbone(ΔgIII)] |
| pSZL1-10 | flow cytometry | KanR | p15A | [VanR]-[pVanA-B0032-Mpro]-[pTac-S1-cIp22_substrate_cI434]-[p434-B0064-eYFP]-[lacI] |
| pSZL1-11 | SP |  | M13 | [M13_backbone-B0032-Mpro] |
| pSZL1-12 | SP |  | M13 | [M13_backbone-B0032-Mpro(C145A)] |
| pSZL1-13 | AP | KanR | p15A | [pTac-S1-cIp22_substrate_cI434]-[p434-B0064-gIII]-[LacI] |
| pSZL1-14 | AP | KanR | p15A | [P_Gate1-gRNA_Mpro_1_chimera_tracrRNA]-[pTac-S1-cIp22_substrate_cI434]-[p434-B0064-gIII]-[LacI] |
| pSZL1-15 | AP | KanR | p15A | [P_Gate1-gRNA_Mpro_2_chimera_tracrRNA]-[pTac-S1-cIp22_substrate_cI434]-[p434-B0064-gIII]-[LacI] |
| pSZL1-16 | AP | KanR | p15A | [P_Gate1-gRNA_Mpro_3_chimera_tracrRNA]-[pTac-S1-cIp22_substrate_cI434]-[p434-B0064-gIII]-[LacI] |
| pSZL1-17 | AP | KanR | p15A | [P_Gate1-gRNA_Mpro_4_chimera_tracrRNA]-[pTac-S1-cIp22_substrate_cI434]-[p434-B0064-gIII]-[LacI] |
| pSZL1-18 | AP | KanR | p15A | [P_Gate1-gRNA_Mpro_5_chimera_tracrRNA]-[pTac-S1-cIp22_substrate_cI434]-[p434-B0064-gIII]-[LacI] |
| pSZL1-19 | AP | KanR | p15A | [P_Gate1-gRNA_Mpro_6_chimera_tracrRNA]-[pTac-S1-cIp22_substrate_cI434]-[p434-B0064-gIII]-[LacI] |
| pSZL1-20 | AP | KanR | p15A | [P_Gate1-gRNA_Mpro_7_chimera_tracrRNA]-[pTac-S1-cIp22_substrate_cI434]-[p434-B0064-gIII]-[LacI] |
| pSZL1-21 | AP | KanR | p15A | [P_Gate1-gRNA_Mpro_8_chimera_tracrRNA]-[pTac-S1-cIp22_substrate_cI434]-[p434-B0064-gIII]-[LacI] |
| pSZL1-22 | AP | KanR | p15A | [P_Gate1-gRNA_Mpro_9_chimera_tracrRNA]-[pTac-S1-cIp22_substrate_cI434]-[p434-B0064-gIII]-[LacI] |
| pSZL1-23 | AP | KanR | p15A | [P_Gate1-gRNA_Mpro_10_chimera_tracrRNA]-[pTac-S1-cIp22_substrate_cI434]-[p434-B0064-gIII]-[LacI] |
| pSZL1-24 | AP | KanR | p15A | [P_Gate1-gRNA_Mpro_11_chimera_tracrRNA]-[pTac-S1-cIp22_substrate_cI434]-[p434-B0064-gIII]-[LacI] |
| pSZL1-25 | AP | KanR | p15A | [P_Gate1-gRNA_Mpro_12_chimera_tracrRNA]-[pTac-S1-cIp22_substrate_cI434]-[p434-B0064-gIII]-[LacI] |
| pSZL1-26 | AP | KanR | p15A | [P_Gate1-gRNA_Mpro_13_chimera_tracrRNA]-[pTac-S1-cIp22_substrate_cI434]-[p434-B0064-gIII]-[LacI] |
| pSZL1-27 | AP | KanR | p15A | [P_Gate1-gRNA_Mpro_14_chimera_tracrRNA]-[pTac-S1-cIp22_substrate_cI434]-[p434-B0064-gIII]-[LacI] |
| pSZL1-28 | AP | KanR | p15A | [P_Gate1-gRNA_Mpro_15_chimera_tracrRNA]-[pTac-S1-cIp22_substrate_cI434]-[p434-B0064-gIII]-[LacI] |
| pSZL1-29 | AP | KanR | p15A | [P_Gate1-gRNA_Mpro_16_chimera_tracrRNA]-[pTac-S1-cIp22_substrate_cI434]-[p434-B0064-gIII]-[LacI] |
| pSZL1-30 | AP | KanR | p15A | [P_Gate1-gRNA_Mpro_17_chimera_tracrRNA]-[pTac-S1-cIp22_substrate_cI434]-[p434-B0064-gIII]-[LacI] |
| pSZL1-31 | AP | KanR | p15A | [P_Gate1-gRNA_Mpro_18_chimera_tracrRNA]-[pTac-S1-cIp22_substrate_cI434]-[p434-B0064-gIII]-[LacI] |
| pSZL1-32 | AP | KanR | p15A | [P_Gate1-gRNA_Mpro_19_chimera_tracrRNA]-[pTac-S1-cIp22_substrate_cI434]-[p434-B0064-gIII]-[LacI] |
| pSZL1-33 | AP | KanR | p15A | [P_Gate1-gRNA_Mpro_20_chimera_tracrRNA]-[pTac-S1-cIp22_substrate_cI434]-[p434-B0064-gIII]-[LacI] |
| pSZL1-34 | AP | KanR | p15A | [P_Gate1-gRNA_Mpro_21_chimera_tracrRNA]-[pTac-S1-cIp22_substrate_cI434]-[p434-B0064-gIII]-[LacI] |
| pSZL1-35 | AP | KanR | p15A | [P_Gate1-gRNA_Mpro_22_chimera_tracrRNA]-[pTac-S1-cIp22_substrate_cI434]-[p434-B0064-gIII]-[LacI] |
| pSZL1-36 | AP | KanR | p15A | [P_Gate1-gRNA_Mpro_23_chimera_tracrRNA]-[pTac-S1-cIp22_substrate_cI434]-[p434-B0064-gIII]-[LacI] |
| pSZL1-37 | AP | KanR | p15A | [P_Gate1-gRNA_Mpro_24_chimera_tracrRNA]-[pTac-S1-cIp22_substrate_cI434]-[p434-B0064-gIII]-[LacI] |
| pSZL1-38 | AP | KanR | p15A | [P_Gate1-gRNA_Mpro_25_chimera_tracrRNA]-[pTac-S1-cIp22_substrate_cI434]-[p434-B0064-gIII]-[LacI] |
| pSZL1-39 | AP | KanR | p15A | [P_Gate1-gRNA_Mpro_26_chimera_tracrRNA]-[pTac-S1-cIp22_substrate_cI434]-[p434-B0064-gIII]-[LacI] |
| pSZL1-40 | AP | KanR | p15A | [P_Gate1-gRNA_Mpro_27_chimera_tracrRNA]-[pTac-S1-cIp22_substrate_cI434]-[p434-B0064-gIII]-[LacI] |
| pSZL1-41 | AP | KanR | p15A | [P_Gate1-gRNA_Mpro_28_chimera_tracrRNA]-[pTac-S1-cIp22_substrate_cI434]-[p434-B0064-gIII]-[LacI] |
| pSZL1-42 | AP | KanR | p15A | [P_Gate1-gRNA_Mpro_29_chimera_tracrRNA]-[pTac-S1-cIp22_substrate_cI434]-[p434-B0064-gIII]-[LacI] |
| pSZL1-43 | AP | KanR | p15A | [P_Gate1-gRNA_Mpro_30_chimera_tracrRNA]-[pTac-S1-cIp22_substrate_cI434]-[p434-B0064-gIII]-[LacI] |
| pSZL1-44 | AP | KanR | p15A | [P_Gate1-gRNA_Mpro_31_chimera_tracrRNA]-[pTac-S1-cIp22_substrate_cI434]-[p434-B0064-gIII]-[LacI] |
| pSZL1-45 | AP | KanR | p15A | [P_Gate1-gRNA_Mpro_32_chimera_tracrRNA]-[pTac-S1-cIp22_substrate_cI434]-[p434-B0064-gIII]-[LacI] |
| pSZL1-46 | flow cytometry | KanR | p15A | [VanR]-[pVanA-B0032-HCV]-[pTac-S1-cIp22_substrate_cI434]-[p434-B0064-eYFP]-[lacI] |
| pSZL1-47 | flow cytometry | KanR | p15A | [VanR]-[pVanA-B0032-Mpro]-[pTac-S1-T7_lysozyme_substrate_T7]-[pT7-B0064-eYFP]-[lacI] |
| pSZL1-48 | SP |  | M13 | [M13_backbone-B0032-AmeR] |
| pSZL1-49 | AP | KanR | p15A | [pAmeR-P2-PhlF]-[pPhlF-sd5gtg-gIII_recoded] |
| pSZL1-50 | AP | KanR | p15A | [P_Gate1-gRNA_AmeR_1-chimera_tracrRNA]-[pAmeR-P2-PhlF]-[pPhlF-sd5gtg-gIII_recoded] |
| pSZL1-51 | AP | KanR | p15A | [P_Gate1-gRNA_AmeR_2-chimera_tracrRNA]-[pAmeR-P2-PhlF]-[pPhlF-sd5gtg-gIII_recoded] |
| pSZL1-52 | AP | KanR | p15A | [P_Gate1-gRNA_AmeR_3-chimera_tracrRNA]-[pAmeR-P2-PhlF]-[pPhlF-sd5gtg-gIII_recoded] |
| pSZL1-53 | AP | KanR | p15A | [P_Gate1-gRNA_AmeR_4-chimera_tracrRNA]-[pAmeR-P2-PhlF]-[pPhlF-sd5gtg-gIII_recoded] |
| pSZL1-54 | AP | KanR | p15A | [P_Gate1-gRNA_AmeR_5-chimera_tracrRNA]-[pAmeR-P2-PhlF]-[pPhlF-sd5gtg-gIII_recoded] |
| pSZL1-55 | AP | KanR | p15A | [P_Gate1-gRNA_AmeR_6-chimera_tracrRNA]-[pAmeR-P2-PhlF]-[pPhlF-sd5gtg-gIII_recoded] |
| pSZL1-56 | AP | KanR | p15A | [P_Gate1-gRNA_AmeR_7-chimera_tracrRNA]-[pAmeR-P2-PhlF]-[pPhlF-sd5gtg-gIII_recoded] |
| pSZL1-57 | AP | KanR | p15A | [P_Gate1-gRNA_AmeR_8-chimera_tracrRNA]-[pAmeR-P2-PhlF]-[pPhlF-sd5gtg-gIII_recoded] |
| pSZL1-58 | AP | KanR | p15A | [P_Gate1-gRNA_AmeR_9-chimera_tracrRNA]-[pAmeR-P2-PhlF]-[pPhlF-sd5gtg-gIII_recoded] |
| pSZL1-59 | AP | KanR | p15A | [P_Gate1-gRNA_AmeR_10-chimera_tracrRNA]-[pAmeR-P2-PhlF]-[pPhlF-sd5gtg-gIII_recoded] |
| pSZL1-60 | AP | KanR | p15A | [P_Gate1-gRNA_AmeR_11-chimera_tracrRNA]-[pAmeR-P2-PhlF]-[pPhlF-sd5gtg-gIII_recoded] |
| pSZL1-61 | AP | KanR | p15A | [P_Gate1-gRNA_AmeR_12-chimera_tracrRNA]-[pAmeR-P2-PhlF]-[pPhlF-sd5gtg-gIII_recoded] |
| pSZL1-62 | AP | KanR | p15A | [P_Gate1-gRNA_AmeR_13-chimera_tracrRNA]-[pAmeR-P2-PhlF]-[pPhlF-sd5gtg-gIII_recoded] |
| pSZL1-63 | flow cytometry | KanR | p15A | [](empty) |
| pSZL1-64 | flow cytometry | KanR | p15A | [J23101-B0064-eYFP](standard) |
| pSZL1-65 | flow cytometry | KanR | p15A | [LacI]-[pTac-B0032-AmeR]-[pAmeR-B0064-eYFP] |
| pSZL1-66 | flow cytometry | KanR | p15A | [LacI]-[VanR]-[pVanA-B0032-AmeR]-[pTac-pAmeR-B0064-eYFP](A IMPLY B) |
| pSZL1-67 | flow cytometry | KanR | p15A | [LacI]-[VanR]-[pVanA-B0032-AmeR]-[pTac-pAmeR-S1-PhlF]-[pPhlF-B0064-eYFP](A NIMPLY B) |
| pSZL1-68 | flow cytometry | KanR | p15A | [LacI]-[VanR]-[pVanA-B0032-AmeR]-[pTac-S1-PhlF]-[pAmeR-pPhlF-B0064-eYFP](NAND) |
| pSZL1-69 | flow cytometry | KanR | p15A | [pTac-S1-cIp22]-[pTac-S1-cI434]-[p434-P2-PhlF]-[pPhlF-B0064-eYFP]-[LacI] |
